# Supplementary material for: Native frustrated Lewis pairs on core–shell In@InOxHy enhances CO2-to-formate conversion
Source: Royal Society of Chemistry journal article supplement (doi:10.1039/d3dt01960h), 2023-01-01
Supplement: d3dt01960h1.pdf [file d3dt01960h1.pdf]

## Supporting Information

### A native frustrated Lewis pairs on core-shell $\text{In@InO}_x\text{H}_y$ enhances $\text{CO}_2$ -to-formate conversion

Hu Li,<sup>a,†</sup> Yuandong Yan,<sup>a,†</sup> Shicheng Yan,<sup>a,\*</sup> Zhentao Yu,<sup>a</sup> Zhigang Zou<sup>a,b</sup>

<sup>a</sup> Collaborative Innovation Center of Advanced Microstructures, Eco-materials and Renewable Energy Research Center (ERERC), National Laboratory of Solid State Microstructures, College of Engineering and Applied Science, Nanjing University, Nanjing 210093, PR China

<sup>b</sup> Jiangsu Key Laboratory For Nano Technology, Department of Physics, Nanjing University, Nanjing, 210093, PR China

\* Corresponding author at: Collaborative Innovation Center of Advanced Microstructures, Nanjing University, Nanjing, 210093, PR China.

E-mail address: [yscfei@nju.edu.cn](mailto:yscfei@nju.edu.cn) (S. Yan)

<sup>†</sup> These authors contributed equally to this work.

---

E-mail address: [yscfei@nju.edu.cn](mailto:yscfei@nju.edu.cn) (S. Yan)

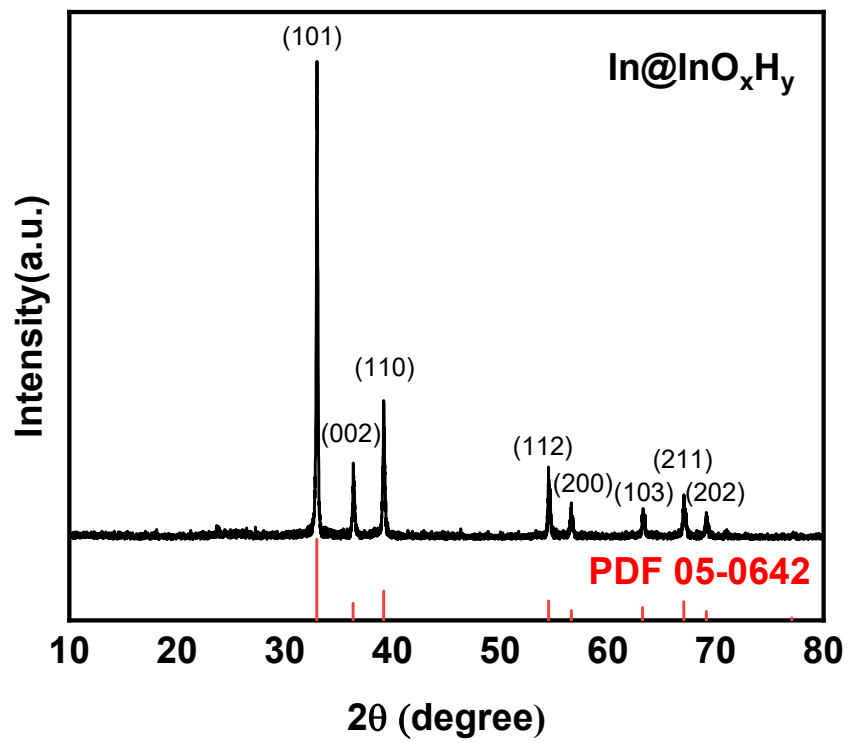

Figure S1. XRD pattern for of  $\text{In@InO}_x\text{H}_y$ .

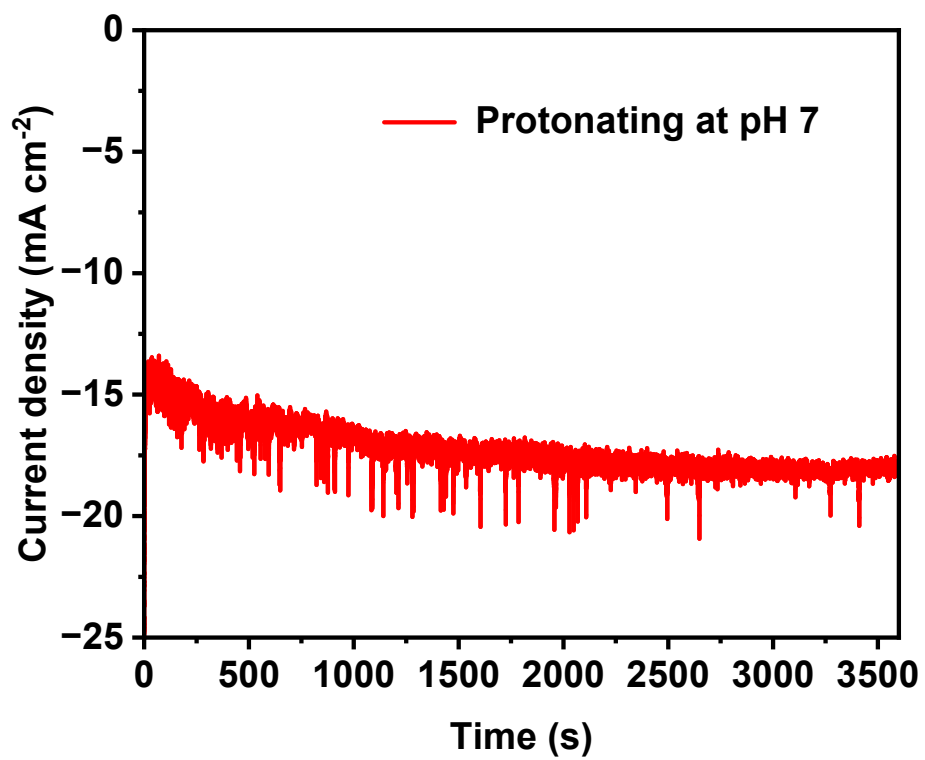

**Figure S2.** Activation curve of In@InO<sub>x</sub>H<sub>y</sub> electrode in CO<sub>2</sub>-saturated 0.5 M KHCO<sub>3</sub> electrolyte.

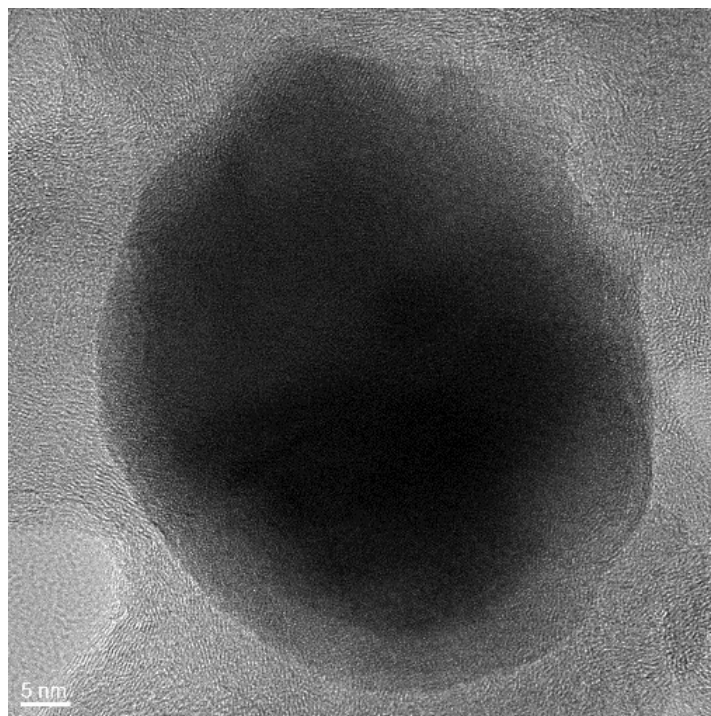

**Figure S3.** HRTEM images of In@InO<sub>x</sub>H<sub>y</sub> after CO<sub>2</sub>RR.

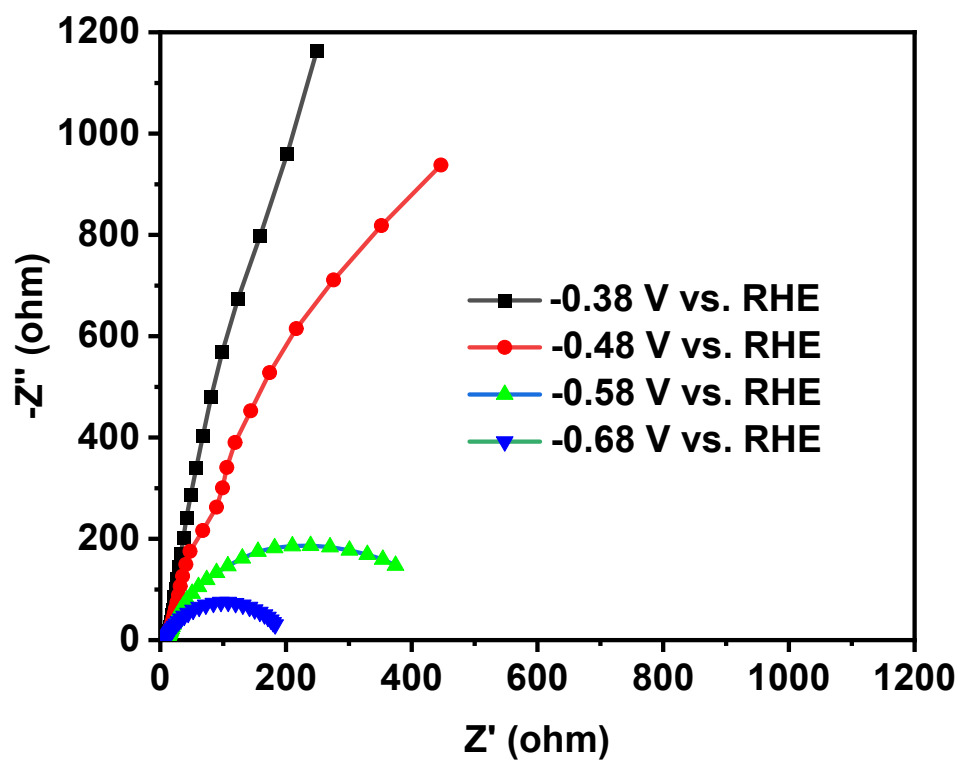

**Figure S4.** Potential-dependent EIS spectra of the In@InO<sub>x</sub>H<sub>y</sub> electrode when potentials varied from -0.38 V to -0.68 V vs. RHE in CO<sub>2</sub>-saturated 0.5 M KHCO<sub>3</sub> electrolyte.

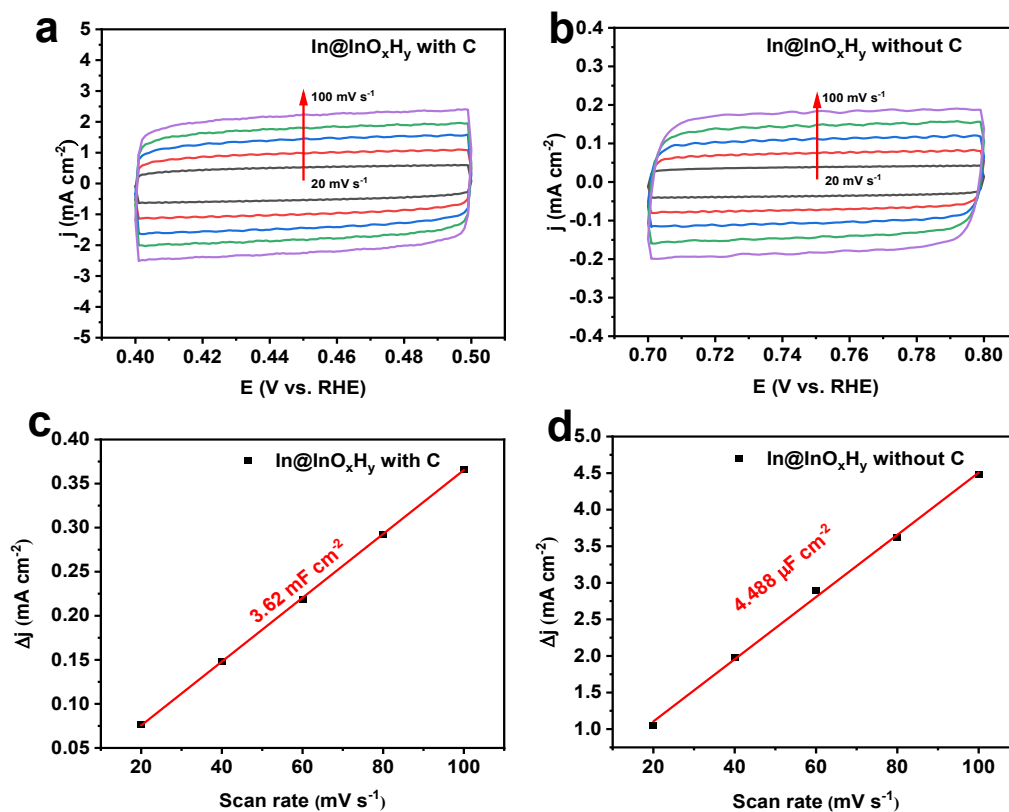

**Figure S5.** (a) Cyclic voltammetry scanning curve of  $\text{In@InO}_x\text{H}_y$  electrode with C and (b)  $\text{In@InO}_x\text{H}_y$  electrode without C, the scanning speed range is 20~100  $\text{mV s}^{-1}$  (c) The functional relationship between the charging current density difference and the scanning speed of  $\text{In@InO}_x\text{H}_y$  electrode with C and (d)  $\text{In@InO}_x\text{H}_y$  electrode without C, the slope is the capacitance value of the electric double layer.

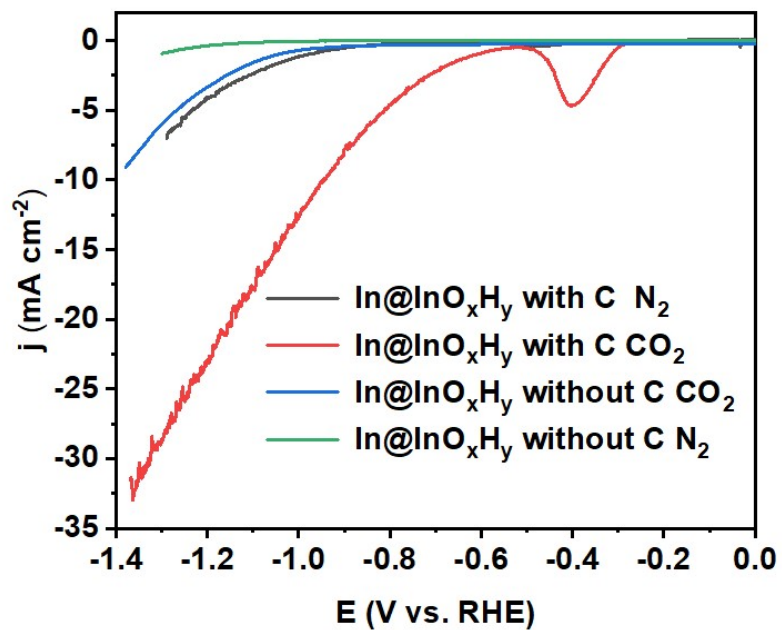

**Figure S6.** LSV curves of In@InO<sub>x</sub>H<sub>y</sub> with and without C in N<sub>2</sub>- or CO<sub>2</sub>-saturated 0.5 M KHCO<sub>3</sub> at the rate of 10 mV s<sup>-1</sup>.

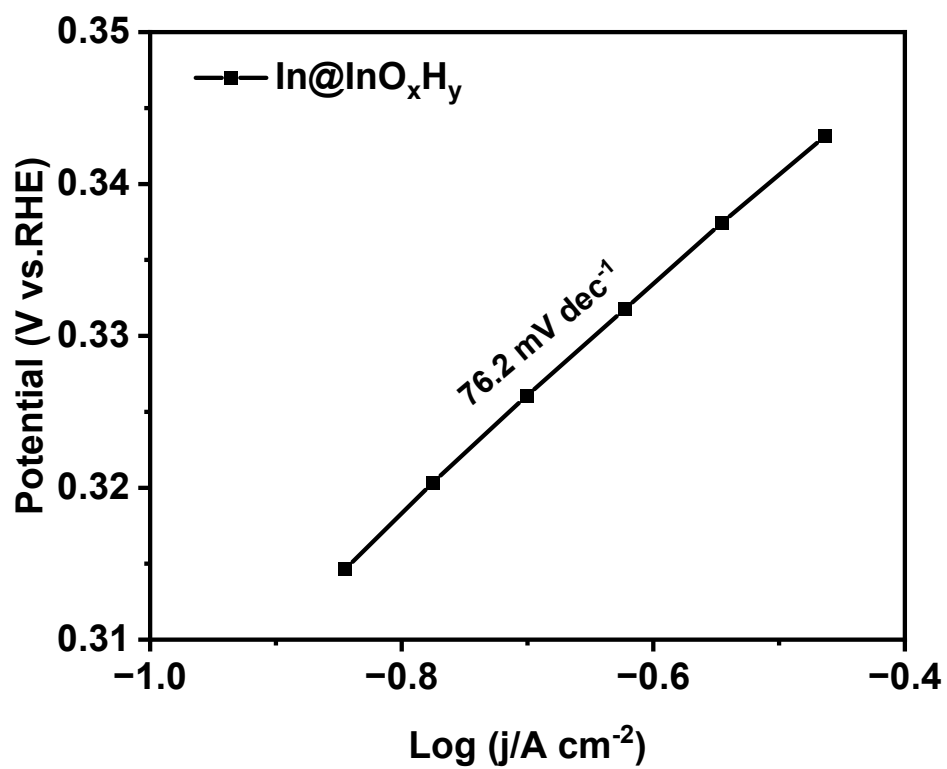

**Figure S7.** Tafel plots of In@InO<sub>x</sub>H<sub>y</sub> in CO<sub>2</sub>-saturated 0.5 M KHCO<sub>3</sub> electrolyte.
